# Supplementary material for: GC-MS Metabolomics and Antifungal Characteristics of Autochthonous Lactobacillus Strains
Source: MDPI journal article supplement (doi:10.3390/dairy2030026), 2021-06-23

Supplementary information

## GC-MS metabolomics and antifungal characteristics of autochthonous *Lactobacillus* strains

Scano et al.

Table S1 - Carbohydrates fermentation profiles of *Lactobacillus* strains.

| Acid produced from           | <i>L. plantarum</i> |         |       | <i>L. brevis</i> |           | <i>L. sakei</i> |    |    |    |
|------------------------------|---------------------|---------|-------|------------------|-----------|-----------------|----|----|----|
|                              | 4/16898             | 1/14537 | C1/15 | M8/1             | DSM 32516 | S3/1            | S4 | S5 | S3 |
| Amygdalin                    | +                   | +       | +     | -                | -         | -               | -  | -  | -  |
| Arabinose                    | +                   | +       | +     | +                | -         | -               | -  | +  | +  |
| Cellobiose                   | +                   | +       | +     | -                | -         | +               | -  | -  | -  |
| Galactose                    | +                   | +       | +     | +                | +         | +               | +  | +  | +  |
| Lactose                      | +                   | +       | +     | -                | -         | +               | -  | -  | -  |
| Inulin                       | -                   | +       | -     | -                | -         | -               | -  | -  | -  |
| Maltose                      | +                   | +       | +     | +                | +         | -               | -  | +  | -  |
| Mannitolo                    | +                   | +       | +     | -                | -         | -               | -  | -  | -  |
| Mannose                      | +                   | +       | +     | -                | -         | +               | +  | +  | +  |
| Melezitose                   | +                   | +       | +     | -                | -         | -               | -  | -  | -  |
| Melibiose                    | +                   | -       | +     | -                | -         | +               | +  | +  | +  |
| Raffinose                    | -                   | -       | +     | -                | -         | -               | -  | -  | -  |
| Ribose                       | +                   | +       | +     | +                | -         | +               | +  | +  | +  |
| Sorbitol                     | +                   | +       | +     | -                | -         | -               | -  | -  | -  |
| Sucrose                      | +                   | +       | +     | -                | +         | +               | +  | +  | +  |
| Trehalose                    | +                   | +       | +     | -                | +         | +               | +  | +  | +  |
| Xylose                       | -                   | -       | -     | -                | -         | -               | -  | -  | -  |
| CO <sub>2</sub> from glucose | -                   | -       | -     | +                | +         | -               | -  | -  | -  |
| Esculin hydrolysis           | +                   | +       | +     | -                | -         | -               | -  | -  | -  |
| Ammonia from arginine        | -                   | -       | -     | +                | -         | +               | +  | +  | -  |

Table S2. List of metabolites and GC-MS characteristics.

| Metabolite    | Abbreviation | Class           | Rt <sup>a</sup> | m/z <sup>b</sup> |                    |
|---------------|--------------|-----------------|-----------------|------------------|--------------------|
| Lactic acid   | LacA         | OA <sup>c</sup> | 15.80           | 147              |                    |
| Glyceric acid | GlycA        | OA              | 16.71           | 147              | Broth <sup>d</sup> |
| Valine        | Val          | AA              | 16.22           | 72               | Broth              |
| Unknown       |              |                 | 17.05           | 258              |                    |

|                           |               |    |       |     |       |
|---------------------------|---------------|----|-------|-----|-------|
| Oxalic acid               | OxalicA       | OA | 17.32 | 147 |       |
| Leucine                   | Leu           | AA | 17.54 | 86  | Broth |
| 3-Hydroxy butyric acid    | BHBA          | OA | 17.68 | 147 |       |
| 2-Hydroxy isovaleric acid | AHVA          | OA | 17.78 | 145 |       |
| Isoleucine                | Ile           | AA | 17.90 | 86  | Broth |
| Unknown                   |               |    | 18.10 | 281 |       |
| 2-Hydroxy isocaproic acid | AHCA          | OA | 18.96 | 159 |       |
| Phosphate                 | Pho           |    | 19.24 | 147 | Broth |
| Unknown                   |               |    | 19.61 | 299 |       |
| Threonine                 | Thr           | AA | 19.87 | 117 | Broth |
| Glycine                   | Gly           | AA | 20.05 | 174 | Broth |
| Succinic acid             | SuccA         | OA | 20.10 | 147 |       |
| Propanoic acid            | PropA         | OA | 20.28 | 219 |       |
| 2,3-butandiol             | 2,3-butandiol |    | 21.11 | 117 |       |
| Unknown                   |               |    | 21.17 | 58  |       |
| Malic acid                | MalA          | OA | 22.28 | 281 |       |
| Unknown                   |               |    | 22.53 | 147 |       |
| Pyroglutamic acid         | PyroGA        | AA | 22.65 | 84  |       |
| Erithriol                 | Erithriol     | S  | 22.84 | 217 |       |
| Unknown                   |               |    | 22.94 | 156 |       |
| 4-aminobutanoic acid      | GABA          | OA | 23.01 | 174 |       |
| Unknown                   |               |    | 23.37 | 147 |       |
| 3-phenyllactic acid       | 3-phen-LacA   | OA | 23.69 | 193 |       |
| Erythrose                 | Erythrose     | S  | 24.9  | 147 |       |
| Unknown                   |               |    | 25.17 | 147 |       |
| Arabitol                  | Arabitol      | S  | 25.38 | 217 |       |
| Unknown                   |               |    | 25.71 | 231 |       |
| Citric acid               | CitrA         | OA | 25.89 | 147 | Broth |
| Unknown                   |               |    | 26.64 | 204 |       |
| Unknown                   |               |    | 26.72 | 217 |       |
| Unknown                   |               |    | 26.81 | 157 |       |
| Fructose                  | Fructose      | S  | 27.05 | 103 | Broth |
| Glucose                   | Glucose       | S  | 27.22 | 204 | Broth |
| Mannose                   | Mannose       | S  | 27.33 | 319 | Broth |
| Galactose                 | Galactose     | S  | 27.66 | 319 | Broth |
| Xylose                    | Xylose        | S  | 27.78 | 204 |       |
| Unknown                   |               |    | 27.89 | 241 |       |
| Talose                    | Talose        | S  | 28.09 | 204 | Broth |
| Unknown                   |               |    | 28.55 | 204 |       |
| Myo-inositol              | Myo-inos      | S  | 29.16 | 305 | Broth |
| Unknown                   |               |    | 29.50 | 59  |       |

|                |           |    |       |     |       |
|----------------|-----------|----|-------|-----|-------|
| Octadecenamide | Oleamide  | FA | 31.27 | 59  |       |
| Unknown        |           |    | 31.64 | 147 |       |
| Unknown        |           |    | 32.27 | 117 |       |
| Unknown        |           |    | 32.74 | 103 |       |
| Unknown        |           |    | 32.85 | 371 |       |
| Palmitic acid  | PalmA     | FA | 33.03 | 371 |       |
| Sucrose        | Sucrose   | S  | 33.51 | 361 | Broth |
| Unknown        |           |    | 33.77 | 117 |       |
| Stearic acid   | StearA    | FA | 34.43 | 399 |       |
| Threulose      | Threulose |    | 34.57 | 361 | Broth |
| Unknown        |           |    | 35.46 | 217 |       |
| Maltose        | Maltose   | S  | 35.51 | 361 | Broth |
| Unknown        |           |    | 36.55 | 217 |       |

a) retention time (min); b)  $m/z$  of ion fragment used for semiquantitative purpose; c) OA = organic acids, AA = amino acids and analogues, S = saccharides and polyols, FA = fatty acids and analogues; d) annotated in broth samples.

Figure S1. PLS-DA coefficients Overview Plot. The plot displays the X-variable coefficients, together with their SE in cross validation, for the three Y-class for those annotated metabolites having VIP values > 1 (LacA, BHBA, AHVA, AHCA, SuccA, MalA, PyroGA, Erythriol, GABA, 3-phen-LacA, Erythrose, Arabinol, Fructose, Glucose, Mannose, Mono-sacch, Sucrose, StearA, Maltose, metabolites abbreviated as in Table S2).

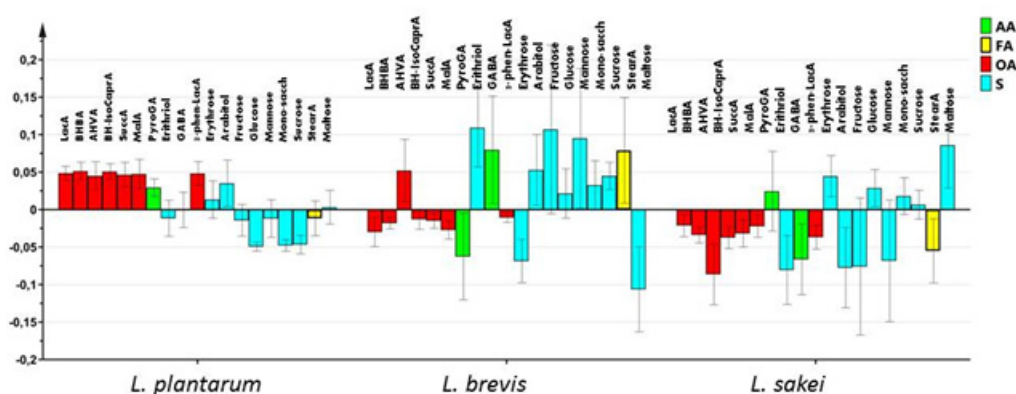

Figure S2. Heat map of  $r$  Pearson correlation values of GC-MS data matrix.  $r$  values are colored from red ( $r = +1$ ) to blue ( $r = -1$ ) scale.

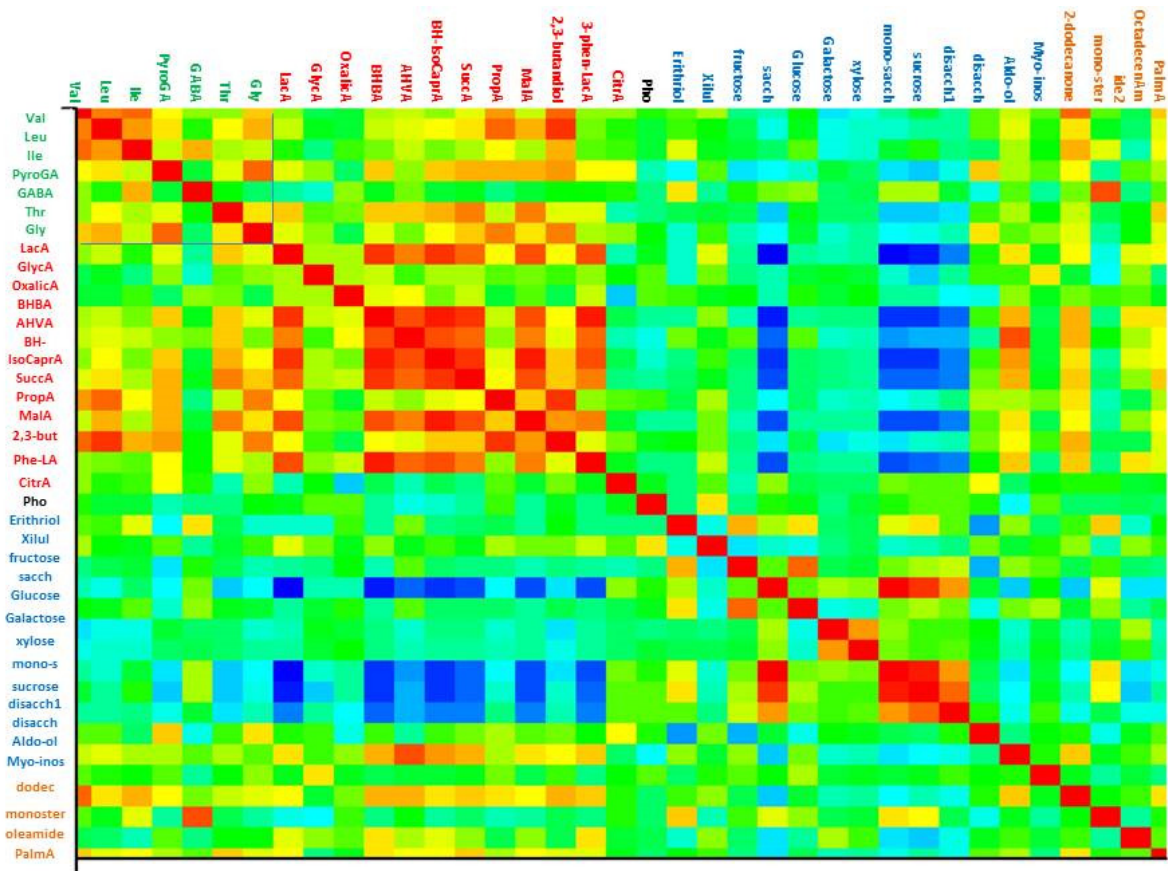

Figure S3. Correlation plot of lactic acid ( $x$ -axis) *vs.* glucose ( $y$ -axis) levels. Lb, Lp, and Ls = *L. brevis*, *L. plantarum* and *L. sakei*.

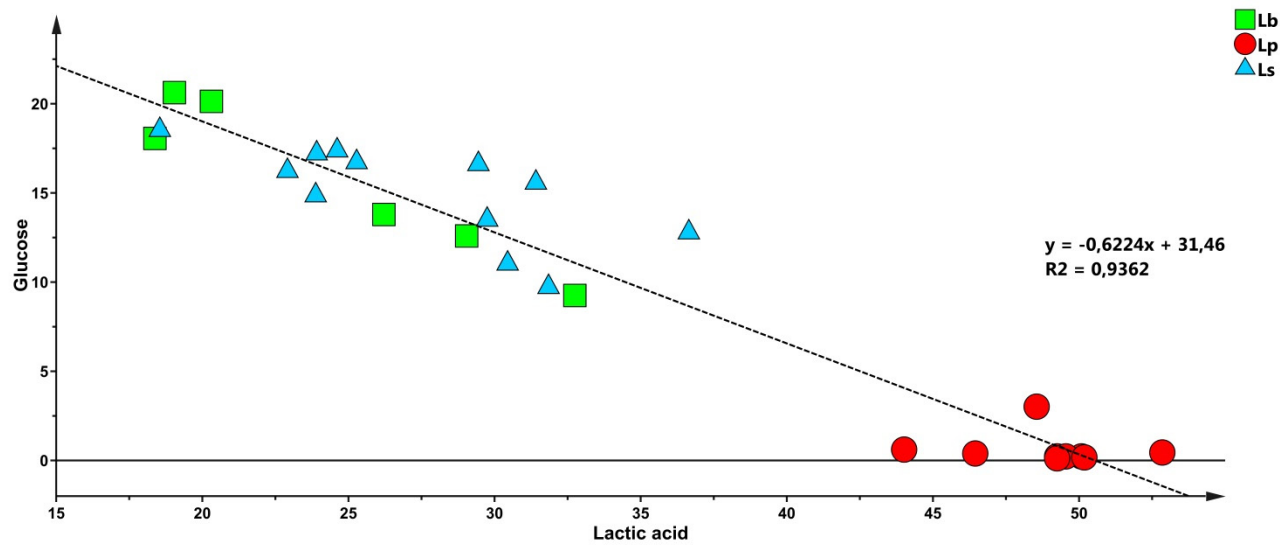

Supplement: s1 [file s1]
